# Supplementary material for: Allolobophora caliginosa coelomic fluid and extract alleviate glucocorticoid-induced osteoporosis in mice by suppressing oxidative stress and regulating osteoblastic/osteoclastic-related markers
Source: PubMed Central journal article supplement (PMC9902447; doi:10.1038/s41598-023-29070-5), 2023-02-06
Supplement: 41598_2023_29070_MOESM1_ESM.pdf [file 41598_2023_29070_MOESM1_ESM.pdf]

**“Allolobophora caliginosa coelomic fluid and extract alleviate glucocorticoid-induced osteoporosis in mice by suppressing oxidative stress and regulating osteoblastic/osteoclastic-related markers”**

Authored by:

1. Ms. Marwa Ahmed Abdelfattah\*  
Demonstrator  
Zoology Department - Faculty of Science - Cairo University  
12613 Giza, Egypt.  
Email: [maabdefattah@sci.cu.edu.eg](mailto:maabdefattah@sci.cu.edu.eg)  
[maabdefattah@cu.edu.eg](mailto:maabdefattah@cu.edu.eg)  
cell phone: +201000955956  
Fax. +2-02-357-275-56

2. Dr. Ayman Saber Mohamed  
Associate professor of Physiology  
Zoology Department - Faculty of Science - Cairo University  
12613, Giza, Egypt.  
Email: [ayman81125@hotmail.com](mailto:ayman81125@hotmail.com)  
[ayman81125@cu.edu.eg](mailto:ayman81125@cu.edu.eg)  
cell phone: [+201275350954](tel:+201275350954)

3. Dr. Sherif Abdelaziz Ibrahim  
Associate professor of cell and cancer biology  
Zoology Department - Faculty of Science - Cairo University  
12613 Giza, Egypt.  
Email: [isherif@cu.edu.eg](mailto:isherif@cu.edu.eg)  
[isherif@sci.cu.edu.eg](mailto:isherif@sci.cu.edu.eg)  
cell phone: +201004858517

4. Prof. Dr. Sohair R. Fahmy  
Professor of physiology  
Zoology Department - Faculty of Science - Cairo University  
12613 Giza, Egypt.  
Email: [sohairfahmy@gmail.com](mailto:sohairfahmy@gmail.com)  
[sohair@sci.cu.edu.eg](mailto:sohair@sci.cu.edu.eg)

**Table 1. Chemical components identified in the *Allolobophora caliginosa* coelomic fluid by GC-MS analysis.**

| <b>Compound name</b>                                          | <b>Retention time</b> | <b>Peak area</b> | <b>Molecular weight</b> | <b>Molecular formula</b>                                      |
|---------------------------------------------------------------|-----------------------|------------------|-------------------------|---------------------------------------------------------------|
| DL-2-Amino-3-phosphonopropionic Acid                          | 6.97                  | 1.1E+08          | 169                     | C <sub>3</sub> H <sub>8</sub> NO <sub>5</sub> P               |
| 2-Pyridinecarboxaldehyde                                      | 10.9                  | 1.5E+08          | 107                     | C <sub>6</sub> H <sub>5</sub> NO                              |
| Hirsutene                                                     | 13.69                 | 2.4E+09          | 204                     | C <sub>15</sub> H <sub>24</sub>                               |
| (1-Bromo-ethanesulfinyl)-ethane                               | 14                    | 2.3E+08          | 184                     | C <sub>4</sub> H <sub>9</sub> BrOS                            |
| 1-Propene, 3,3'-oxybis [2-chloro-                             | 14                    | 2.3E+08          | 166                     | C <sub>6</sub> H <sub>8</sub> C <sub>12</sub> O               |
| Pentadecanoic acid                                            | 26.87                 | 1.9E+09          | 270                     | C <sub>17</sub> H <sub>34</sub> O <sub>2</sub>                |
| 13-Heptadecyn-1-ol                                            | 30                    | 3.9E+08          | 252                     | C <sub>17</sub> H <sub>32</sub> O                             |
| 2-(9,12-octadecadienoyl)-, (Z,Z)-Ethanol                      | 30                    | 3.9E+08          | 310                     | C <sub>20</sub> H <sub>38</sub> O <sub>2</sub>                |
| 10-Octadecenoic acid, methyl ester                            | 30.12                 | 2E+09            | 296                     | C <sub>19</sub> H <sub>36</sub> O <sub>2</sub>                |
| Methyl 9,10-dideutero octadecanoate                           | 30.12                 | 2E+09            | 300                     | C <sub>19</sub> H <sub>36</sub> D <sub>2</sub> O <sub>2</sub> |
| Methyl stearate                                               | 30.6                  | 1E+09            | 298                     | C <sub>19</sub> H <sub>38</sub> O <sub>2</sub>                |
| Hexadecadienoic acid, methyl ester                            | 31.72                 | 2.1E+08          | 270                     | C <sub>17</sub> H <sub>34</sub> O <sub>2</sub>                |
| [1,1'-Bicyclopropyl]-2-octanoic acid, 2'-hexyl-, methyl ester | 31.72                 | 2.1E+08          | 322                     | C <sub>21</sub> H <sub>38</sub> O <sub>2</sub>                |
| 9,12-Octadecadienoyl chloride, (Z,Z)-                         | 31.72                 | 2.1E+08          | 298                     | C <sub>18</sub> H <sub>31</sub> ClO                           |
| 5,8,11,14-Eicosatetraenoic acid, methyl ester, (all-Z)-       | 32.71                 | 2.2E+08          | 302                     | C <sub>20</sub> H <sub>30</sub> O <sub>2</sub>                |
| 6,9,12- Octadecatrienoic acid, methyl ester                   | 33.69                 | 2.2E+08          | 312                     | C <sub>19</sub> H <sub>36</sub> O <sub>3</sub>                |

**Table 2. Chemical components identified in the *Allolobophora caliginosa* extract by GC-MS analysis.**

| Compound name                                                                                       | Retention time | Peak area     | Molecular weight | Chemical formula                                               |
|-----------------------------------------------------------------------------------------------------|----------------|---------------|------------------|----------------------------------------------------------------|
| Dichloromethyl propyl sulfone                                                                       | 5.1            | 300824933     | 176              | C <sub>3</sub> H <sub>6</sub> Cl <sub>2</sub> O <sub>2</sub> S |
| 2H-Inden-2-one, octahydro-3a-phenyl-, trans-                                                        | 5.1            | 300824933     | 229              | C <sub>15</sub> H <sub>19</sub> NO                             |
| 2H-Pyrrole, 2,2-dimethyl-3,5-diphenyl-, 1-oxide                                                     | 5.1            | 300824933     | 263              | C <sub>18</sub> H <sub>17</sub> NO                             |
| Spiro[3H-indole-3,2'-pyrrolidin]-2(1H)                                                              | 5.1            | 300824933     | 253              | C <sub>17</sub> H <sub>19</sub> NO                             |
| Methyl 2-oxo-7à,10Aá-dimethyl-8á-M                                                                  | 5.1            | 300824933     |                  |                                                                |
| ethoxy-4à-(1-methylethyl)4,6,6Aà,7,8,9,10,10A-octahydro-2H-naptho[2,1-C] pyran-7á-carboxylate       | 5.1            | 300824932.89  | 362              | C <sub>21</sub> H <sub>30</sub> O <sub>5</sub>                 |
| DL-2-Amino-3-phosphonopropionicacid                                                                 | 9.06           | 503949458     | 169              | C <sub>3</sub> H <sub>8</sub> NO <sub>5</sub> P                |
| Hexadecanoic acid, methyl ester                                                                     | 26.82          | 837357023     | 270              | C <sub>17</sub> H <sub>34</sub> O <sub>2</sub>                 |
| Pentadecanoic acid, 14-methyl-, methyl ester                                                        | 26.82          | 837357023     | 270              | C <sub>17</sub> H <sub>34</sub> O <sub>2</sub>                 |
| Cyclopentane tridecanoic acid, methyl ester                                                         | 26.82          | 837357023     | 296              | C <sub>19</sub> H <sub>36</sub> O <sub>2</sub>                 |
| Hexadecanoic acid                                                                                   | 28.98          | 4174193859.97 | 256              | C <sub>16</sub> H <sub>32</sub> O <sub>2</sub>                 |
| Linoleic acid ethyl ester                                                                           | 29.98          | 662617805     | 308              | C <sub>20</sub> H <sub>36</sub> O <sub>2</sub>                 |
| 9,12-Octadecadienoic acid, ethyl ester -                                                            | 29.98          | 662617805     |                  |                                                                |
| Cyclopropane octanoic acid, 2-[[2-[(2-ethylcyclopropyl) methyl] cyclopropyl] methyl]-, methyl ester | 29.98          | 662617805     | 334              | C <sub>22</sub> H <sub>38</sub> O <sub>2</sub>                 |
| 10-Octadecenoic acid methyl ester                                                                   | 30.11          | 1.722E+09     | 296              | C <sub>19</sub> H <sub>36</sub> O <sub>2</sub>                 |
| Methyl 9,10-dideutero octadecanoate                                                                 | 30.11          | 1.722E+09     | 300              | C <sub>19</sub> H <sub>36</sub> D <sub>2</sub> O <sub>2</sub>  |
| Hexadecanoic acid, 2,3-dihydroxypropyl ester                                                        | 32.48          | 1.897E+09     | 330              | C <sub>19</sub> H <sub>38</sub> O <sub>4</sub>                 |
| Hi-oleic safflower oil                                                                              | 33.33          | 380105196     | 450              | C <sub>21</sub> H <sub>22</sub> O <sub>11</sub>                |
| 9-Octadecenoic acid, 12-hydroxy-, methyl ester, [R-(Z)]-                                            | 33.74          | 2.915E+09     | 312              | C <sub>19</sub> H <sub>36</sub> O <sub>3</sub>                 |
